# Supplementary material for: The rationality of using core–shell nanoparticles with embedded internal standards for SERS quantitative analysis based glycerol-assisted 3D hotspots platform
Source: Royal Society of Chemistry journal article supplement (doi:10.1039/d1ra01957k), 2021-01-01
Supplement: d1ra01957k1.pdf [file d1ra01957k1.pdf]

## Supporting Information for

### The rationality of using core-shell nanoparticles with embedded internal standards for SERS quantitative analysis based glycerol-assisted 3D hotspots platform

Xiao-An Wang,<sup>a,b</sup> Wei Shen,<sup>a</sup> Binbin Zhou,<sup>a,c</sup> Daoyang Yu,<sup>a</sup> Xianghu Tang,<sup>\* a</sup> Jinhui Liu,<sup>\*a,b</sup>  
Xingjiu Huang<sup>a,b</sup>

<sup>a</sup> Environmental Materials and Pollution Control Laboratory, Institute of Solid State Physics, HFIPS, Chinese Academy of Sciences, Hefei 230031, China.

<sup>b</sup> Institute of Physical Science and Information Technology, Anhui University, Hefei 230601, China.

<sup>c</sup> Department of Mechanical Engineering, City University of Hong Kong, Kowloon, Hong Kong, China.

\*X.H.T. (tangxh2011@iim.ac.cn). Fax: (+86)551-65591132.

\*J.H.L. (jhliu@iim.ac.cn). Fax: (+86)551-65591142.

#### Section 1: Hydrophobic treatment of silicon wafers.

Hydrophobic silicon wafers were prepared according to the literatures.<sup>1-3</sup> The silicon wafers were firstly rinsed with ethanol, immersed in aqua regia (hydrochloric acid: nitric acid = 3:1, volume ratio) for 2 h, and placed in the ultrasonic cleaner for 0.5 h. Then, the silicon wafers were immersed into a boiling solution prepared by mixing 30% H<sub>2</sub>O<sub>2</sub> and concentrated H<sub>2</sub>SO<sub>4</sub> (98%) at a volume ratio of 1:3 for 1 h, and rinsed repeatedly with ultrapure water. After repeating step 2 and drying the silicon wafers, immersed them in 40 mm triethoxy-1H, 1H, 2H, 2H-tridecafluoro-n-octylsilane ethanol solution for 2 h, then cleaned with ultrapure water and dried with nitrogen. Finally, the silicon wafers were dried at 120°C for 2 h for future use. Typical optical images of an aqueous droplet sitting on the hydrophobic silicon wafer at different states over time can be seen in Fig.S1.

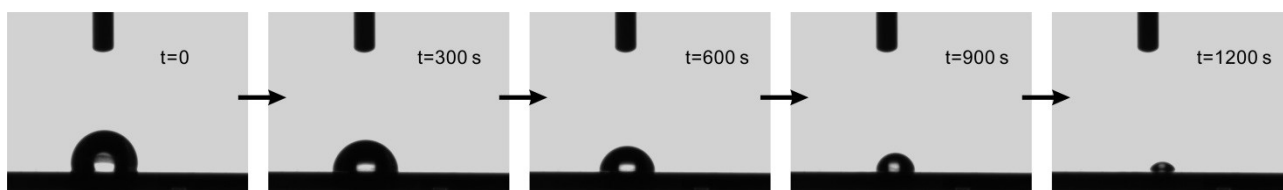

**Fig.S1** Optical images of an aqueous droplet sitting on the hydrophobic silicon wafer at different states over time.

## Section 2: Size distribution obtained based on the SEM images.

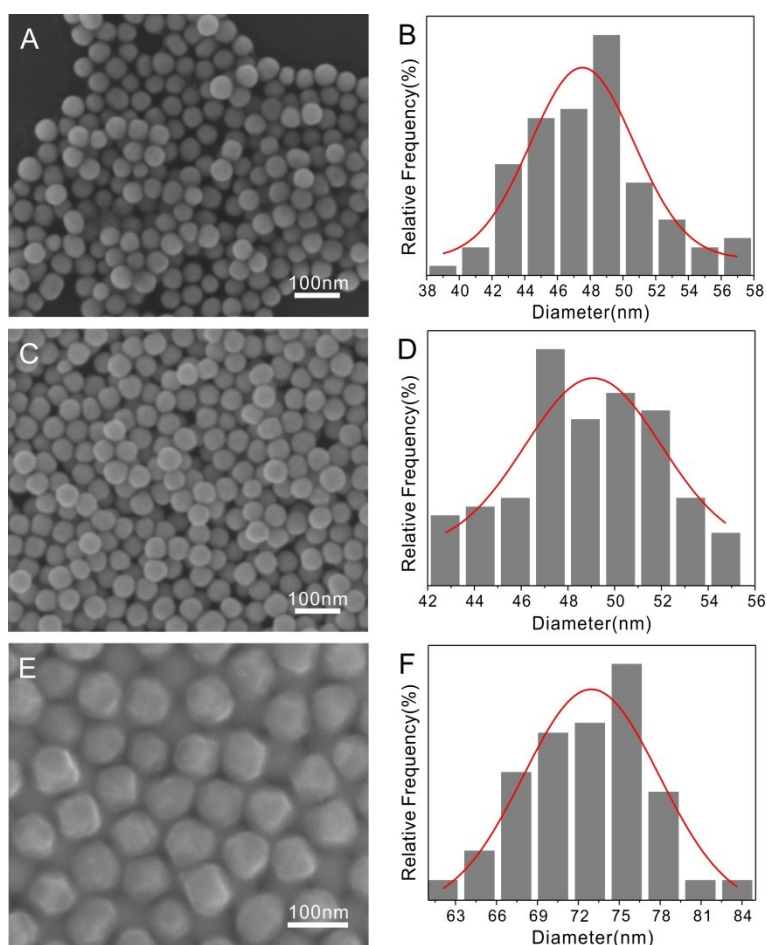

**Fig.S2** A and B) SEM and diameter distributions of AuNPs. C and D) SEM and diameter distributions of Au@4-Mpy NPs. E and F) SEM and diameter distributions of Au@4-Mpy@AgNPs.

## Section 3: EDS spectrum of Au@4-Mpy@AgNPs.

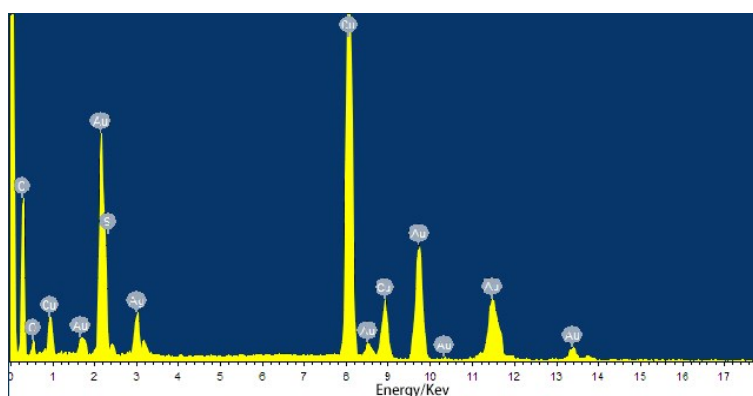

**Fig.S3** EDS spectrum of Au@4-Mpy@AgNPs. It is indicated that as-prepared product consists of Au, Ag and S. As a note, the Cu element was detected in the sample originate from copper grids.

#### Section 4: Optical properties of the AuNPs and Au@4-Mpy NPs.

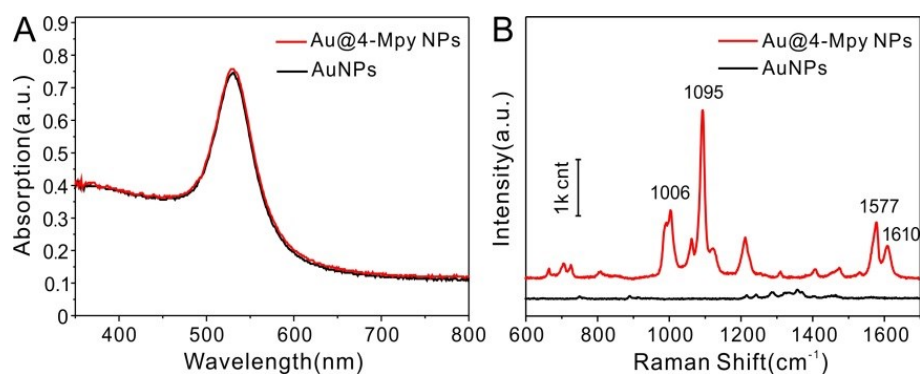

**Fig.S4** A) UV-vis absorption spectra of the core of AuNPs (black) and Au@4-Mpy NPs. B) SERS spectra of AuNPs (black) and Au@4-Mpy NPs (red).

#### Section 5: Absorption spectra of Au@AgNPs and Au@4-Mpy@AgNPs.

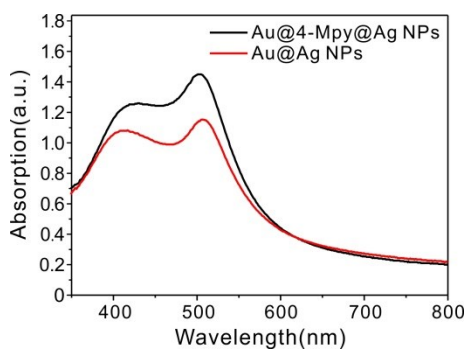

**Fig.S5** UV-vis absorption spectra of Au@AgNPs (red) and Au@4-Mpy@AgNPs (black).

#### Section 6: The zeta potential of AuNPs, Au@4-Mpy NPs and Au@4-Mpy@AgNPs.

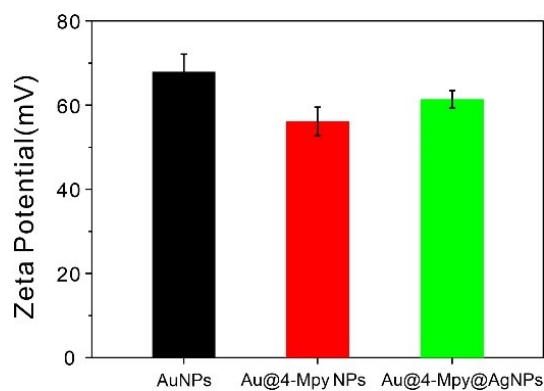

**Fig.S6** The zeta potential of AuNPs, Au@4-Mpy NPs and Au@4-Mpy@AgNPs.

## Section 7: Calculation of enhancement factor (EF) values for Au@4-Mpy@AgNPs

In order to observe the enhancement intuitively and quantitatively, the SERS EF<sup>4-6</sup> was calculated as follows:

$$EF = \frac{I_{\text{SERS}}/N_{\text{SERS}}}{I_0/N_0}$$

where  $I_0$  and  $N_0$  are the peak intensity and corresponding total number of analyte molecules in the scattering volume ( $V_{\text{Raman}}$ ) for the regular Raman (non-SERS) measurement with 0.05 M 4-Mpy aqueous solution (4-Mpy is slightly soluble in water) on Si wafers, respectively; and  $I_{\text{SERS}}$  and  $N_{\text{SERS}}$  are the peak intensity and the average number of embedded molecules in the scattering volume ( $V_{\text{SERS}}$ ) for the SERS experiments, respectively.

The average diameter of the Au core is approximately  $48 \pm 3$  nm. It is reasonable to assume that each particle is spherical. Thus, the sphere surface area of a single particle can be calculated as follows:

$$S_{\text{core}} = 4\pi R^2$$

where  $R = 24$  nm, which is the radius of the Au core.

**Table S1** Structural parameters of 4-Mpy.

| Atom  | Bond Atom | Bond length (Å) | Angle Atom | Angle (°) | Ball & stick model of 4-Mpy linked with Au atom |
|-------|-----------|-----------------|------------|-----------|-------------------------------------------------|
| C(1)  |           |                 |            |           |                                                 |
| C(2)  | C(1)      | 1.3858          |            |           |                                                 |
| N(3)  | C(2)      | 1.3509          | C(1)       | 123.7956  |                                                 |
| H(10) | C(2)      | 1.1             | C(1)       | 118.1019  |                                                 |
| C(4)  | N(3)      | 1.3509          | C(2)       | 116.6195  |                                                 |
| C(5)  | C(4)      | 1.3858          | N(3)       | 123.8024  |                                                 |
| H(11) | C(4)      | 1.1             | N(3)       | 118.0988  |                                                 |
| C(6)  | C(1)      | 1.391           | C(2)       | 118.2348  |                                                 |
| S(7)  | C(6)      | 1.815           | C(1)       | 120.3421  |                                                 |
| H(9)  | C(1)      | 1.1             | C(2)       | 120.8826  |                                                 |
| H(12) | C(5)      | 1.1             | C(4)       | 120.8843  |                                                 |
| Au(8) | S(7)      | 2.36            | C(6)       | 119.9998  |                                                 |

From the structural parameters of 4-Mpy, it can be calculated that each 4-Mpy molecule occupies  $\sim 0.49 \text{ nm}^2$  on the surface of Au core. Therefore, the number of molecules loaded per particle can be calculated as follows:

$$N_0 = S_{\text{core}} / 0.49 \text{ nm}^2 = 4\pi R^2 / 0.49 \text{ nm}^2 = 1.5 \times 10^4 \text{ p}^{-1}$$

Meanwhile, the concentration of AuNPs was estimated to be  $\sim 1 \times 10^{10} \text{ P/mL}$ . So the apparent concentration of 4-Mpy (loaded molecules) of AuNPs@4-Mpy is:

$$C_{0, \text{Mpy/core}} = (N_0 * 1 \times 10^{10} \text{ P/mL}) / N_A = 0.25 \times 10^{-6} \text{ M}$$

Here,  $N_A$  represents the Avogadro constant,  $6.022 \times 10^{23}$ .

Furthermore, the calculated value of apparent concentration of 4-Mpy (embedded molecules) of AuNPs@4-Mpy@Ag,  $C_{0, \text{Mpy/Au@IS@Ag}}$ , is  $\sim 0.2 \times 10^{-6} \text{ M}$ .

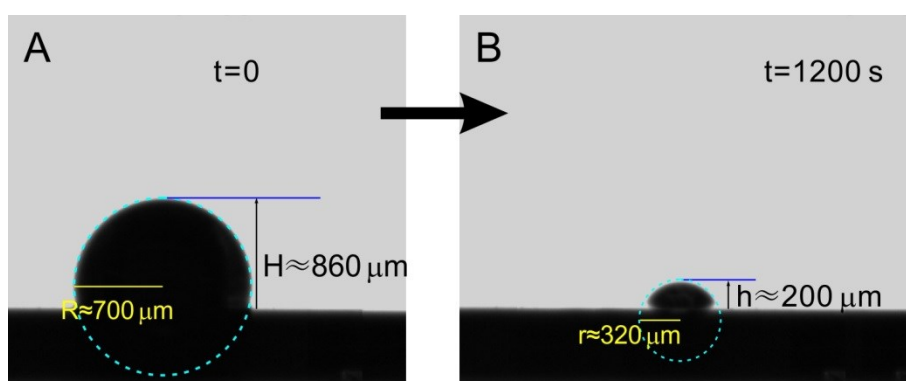

**Fig.S7** Measured the height (H, h) of a 1  $\mu\text{L}$  droplet of concentrated AuNP@4-Mpy@Ag sols on the hydrophobic silicon wafer. (A) The initial state of the height (H) was  $\sim 860 \mu\text{m}$ . (B) Remaining portion of the evaporating droplet after approximately 1200s, the final state of the height (h) had decreased to  $\sim 200 \mu\text{m}$ .

After 10 mL of AuNP@4-Mpy@Ag sols was concentrated to 20  $\mu\text{L}$ , the apparent concentration of 4-Mpy (embedded molecules) of AuNPs@4-Mpy@Ag,  $C_{i, \text{Mpy/Au@IS@Ag}}$ , is  $\sim 1 \times 10^{-4} \text{ M}$ .

The initial state of the droplet was about 1  $\mu\text{L}$ , and from figure S7, it can be calculated that the final state of the droplet was about:  $V_{\text{final}} = \pi h^2 (r - h/3) = 0.032 \mu\text{L}$ . Therefore, the apparent concentration of 4-Mpy (embedded molecules) of AuNPs@4-Mpy@Ag,  $C_{f, \text{Mpy/Au@IS@Ag}}$ , is  $\sim 3 \times 10^{-3} \text{ M}$ .

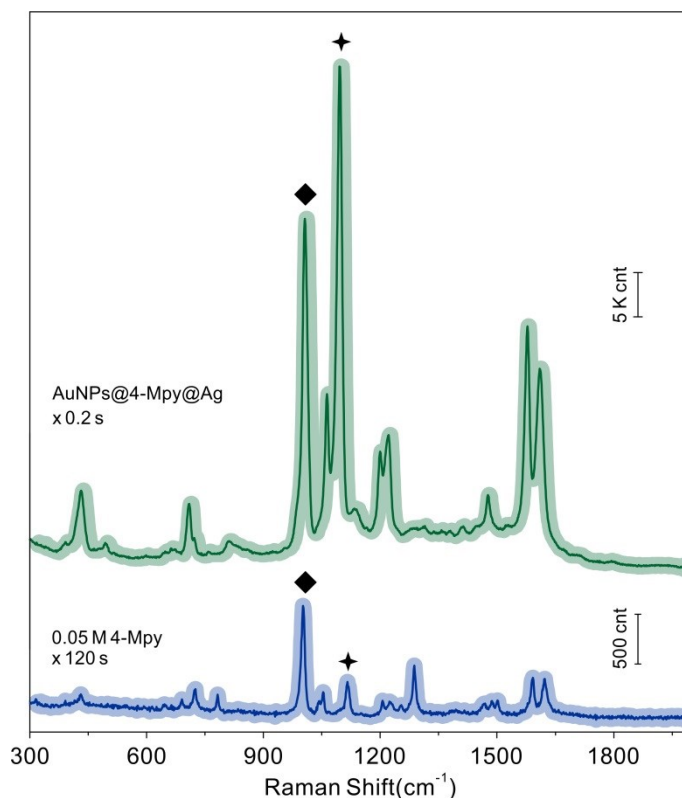

**Fig.S8** Raman (0.05 M 4-Mpy aqueous solution) and SERS (embedded molecules of AuNPs@4-Mpy@Ag) of 4-Mpy.

**Table S2** Assignments and Raman shifts for Raman and SERS of 4-Mpy. <sup>7-9</sup>

| AuNPs@4-Mpy@Ag | 0.05 M 4-Mpy aqueous solution |                          | Assignment                    |
|----------------|-------------------------------|--------------------------|-------------------------------|
|                | SERS / cm <sup>-1</sup>       | Raman / cm <sup>-1</sup> |                               |
|                | 1006                          | 1002                     | Ring breath                   |
|                | 1095                          | 1116                     | Trigonal ring breath, str C-S |

Based on algorithms:

$$EF = \frac{I_{SERS}/N_{SERS}}{I_{Raman}/N_{Raman}} = \frac{I_{SERS}/C_{SERS}V_{SERS}}{I_{Raman}/C_{Raman}V_{Raman}}$$

On account of all of the systems under test are liquid, so the two values of  $V_{SERS}$  and  $V_{Raman}$  can be considered equal.

Here, Raman and SERS spectra were performed on a LabRAM HR800 confocal microscope Raman system (Horiba Jobin Yvon) using a He–Ne laser operating at 632.8 nm. The laser beam was focused on the sample using a 10× LMPLFLN microscope objective (numerical aperture, NA =

0.25; working distance, WD = 10.6 mm). The laser power was approximately 2 mW. It's worth noting that, under the same laser power condition, the exposure time of the two systems is different. More details of Raman (0.05 M 4-Mpy aqueous solution) and SERS (embedded molecules of AuNPs@4-Mpy@Ag) of 4-Mpy can be seen in Fig.S8.

Based on the intensities of the ring breath vibration modes at  $1006\text{ cm}^{-1}$  (SERS spectra: exposure time, 0.2 S; intensity, 43614 cnt) and at  $1002\text{ cm}^{-1}$ , (Raman spectra: exposure time, 120 S; intensity, 1250 cnt), the EF was calculated to be  $3.5 \times 10^5$ .

Based on the intensities of the trigonal ring breath vibration modes at  $1095\text{ cm}^{-1}$  (SERS spectra: exposure time, 0.2 S; intensity, 60847 cnt) and at  $1116\text{ cm}^{-1}$  (Raman spectra: exposure time, 120 S; intensity, 481 cnt), the EF was calculated to be  $1.27 \times 10^6$ , which showing a good SERS activity of the AuNPs@4-Mpy@Ag substrate.

## Section 8: SERS spectra of CV.

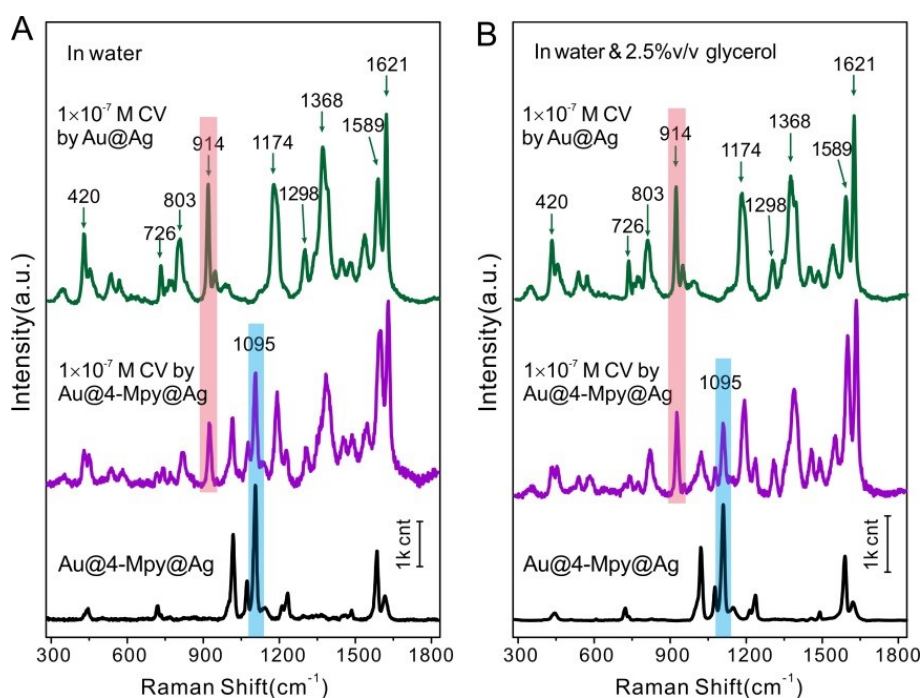

**Fig.S9** A) In water-dispersed drying film system: SERS spectra of CV based Au@AgNPs, Au@4-Mpy@AgNPs and typical Raman spectra of Au@4-Mpy@AgNPs, respectively. B) In the glycerol-assisted liquid film protection system: SERS spectra of CV based Au@AgNPs, Au@4-Mpy@AgNPs and typical Raman spectra of Au@4-Mpy@AgNPs, respectively. The corresponding structural characterization of Au@AgNPs can be seen in Figure S6. The primary vibrations of CV are confirmed according to the literatures.<sup>10-13</sup>

## Section 9: SEM and TEM characterization of Au@AgNPs.

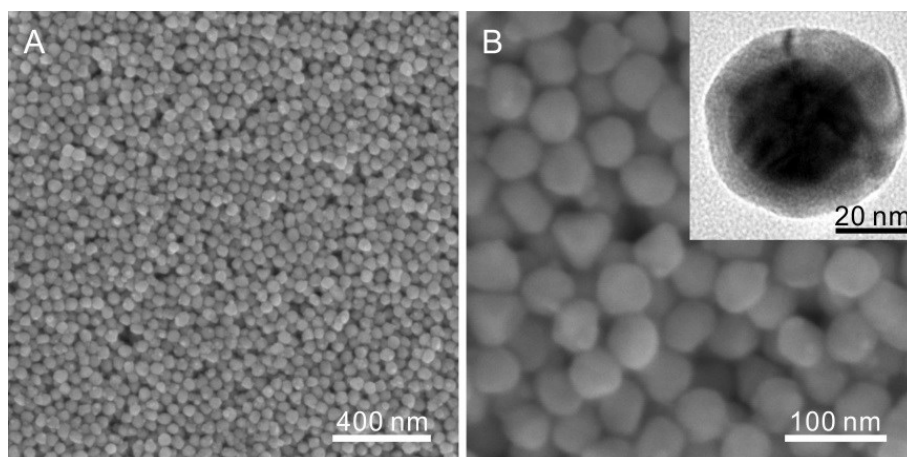

**Fig.S10** Structural characterization of Au@AgNPs for comparative study: typical SEM images of A) and B) Au@AgNPs correspond to different magnifications; the inset of B) is the typical TEM image of Au@AgNPs.

## References

1. Y. Wang, Z. Wei, Y. Zhang and Y. Chen, *Langmuir*, 2019, **35**, 15795-15804.
2. H. Liu, Z. Yang, L. Meng, y. sun, J. Wang, L. Yang, J. Liu and Z. Tian, *J. Am. Chem. Soc.*, 2014, **136**, 5332-5341.
3. Y. Sun, Z. Han, H. Liu, S. He, L. Yang and J. Liu, *Nanoscale*, 2015, **7**, 6619-6626.
4. E. C. L. Ru, E. Blackie, M. Meyer and P. G. Etchegoin, *J. Phys. Chem. C*, 2007, **111**, 13794-13803.
5. X. Tang, W. Cai, L. Yang and J. Liu, *Nanoscale*, 2013, **5**, 11193-11199.
6. W. Nam, X. Ren, S. A. S. Tali, P. Ghassemi, I. Kim, M. Agah and W. Zhou, *Nano Lett.*, 2019, **19**, 7273-7281.
7. H. Guo, L. Ding, T. Zhang and Y. Mo, *J. Mol. Struct.*, 2013, **1035**, 231-235.
8. N. Wattanavichean, M. Gilby, R. J. Nichols and H. Arnolds, *Anal. Chem.*, 2019, **91**, 2644-2651.
9. L. Bi, Y. Wang, Y. Yang, Y. Li, S. Mo, Q. Zheng and L. Chen, *ACS Applied Materials & Interfaces*, 2018, **10**, 15381-15387.
10. M. Li, J.-Y. Wang, Q.-Q. Chen, L.-H. Lin, P. Radjenovic, H. Zhang, S.-Y. Luo, Z.-Q. Tian and J.-F. Li, *Anal. Chem.*, 2019, **91**, 15025-15031.
11. X. Tang, W. Cai, L. Yang and J. Liu, *Nanoscale*, 2014, **6**, 8612-8616.
12. S. L. Kleinman, E. Ringe, N. Valley, K. L. Wustholz, E. Phillips, K. A. Scheidt, G. C. Schatz and R. P. Van Duyne, *J. Am. Chem. Soc.*, 2011, **133**, 4115-4122.
13. W. Meng, F. Hu, L. Zhang, X. Jiang, L. Lu and X. Wang, *J. Mol. Struct.*, 2013, **1035**, 326-331.
